# Supplementary material for: Rational design of C2N-based type-II heterojunctions for overall photocatalytic water splitting
Source: PubMed Central journal article supplement — Nanoscale Adv. 2018 Sep 11;1(1):154–61. doi: 10.1039/c8na00084k (PMC9473186; doi:10.1039/c8na00084k), 2018-09-11
Supplement: NA-001-C8NA00084K-s001.pdf [file NA-001-C8NA00084K-s001.pdf]

# **Rational design of C<sub>2</sub>N-based type-II heterojunctions for overall photocatalytic water splitting**

Xu Zhang, An Chen, Zihe Zhang, Menggai Jiao, Zhen Zhou\*

School of Materials Science and Engineering, National Institute for Advanced Materials, Institute of New Energy Material Chemistry, Computational Centre for Molecular Science, Nankai University, Tianjin 300350, P. R. China

\*Corresponding Authors. Email: zhouzhen@nankai.edu.cn (Z.Z.)

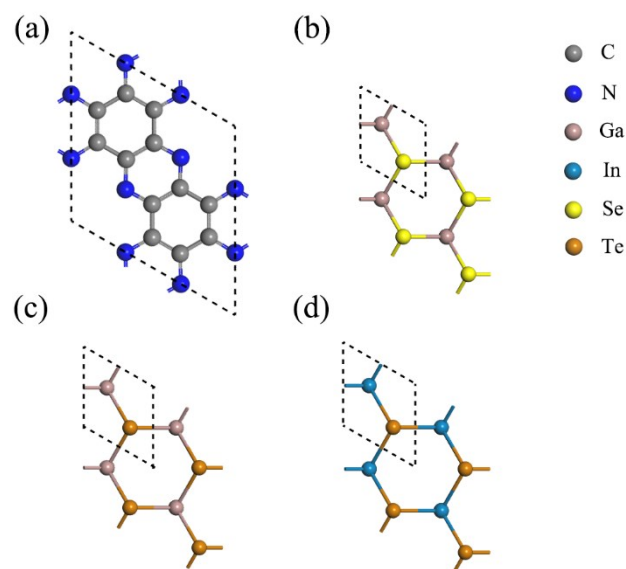

**Fig. S1** Optimized geometric structures for (a)  $C_2N$ , (b) GaSe, (c) GaTe and (d) InTe. The areas circled by dashed lines represent the unit cell.

**Table S1.** Lattice parameters ( $a = b$ ) ( $\text{\AA}$ ) for  $C_2N$ , GaSe, GaTe and InTe.

|        | a    |
|--------|------|
| $C_2N$ | 8.32 |
| GaSe   | 3.77 |
| GaTe   | 4.09 |
| InTe   | 4.32 |

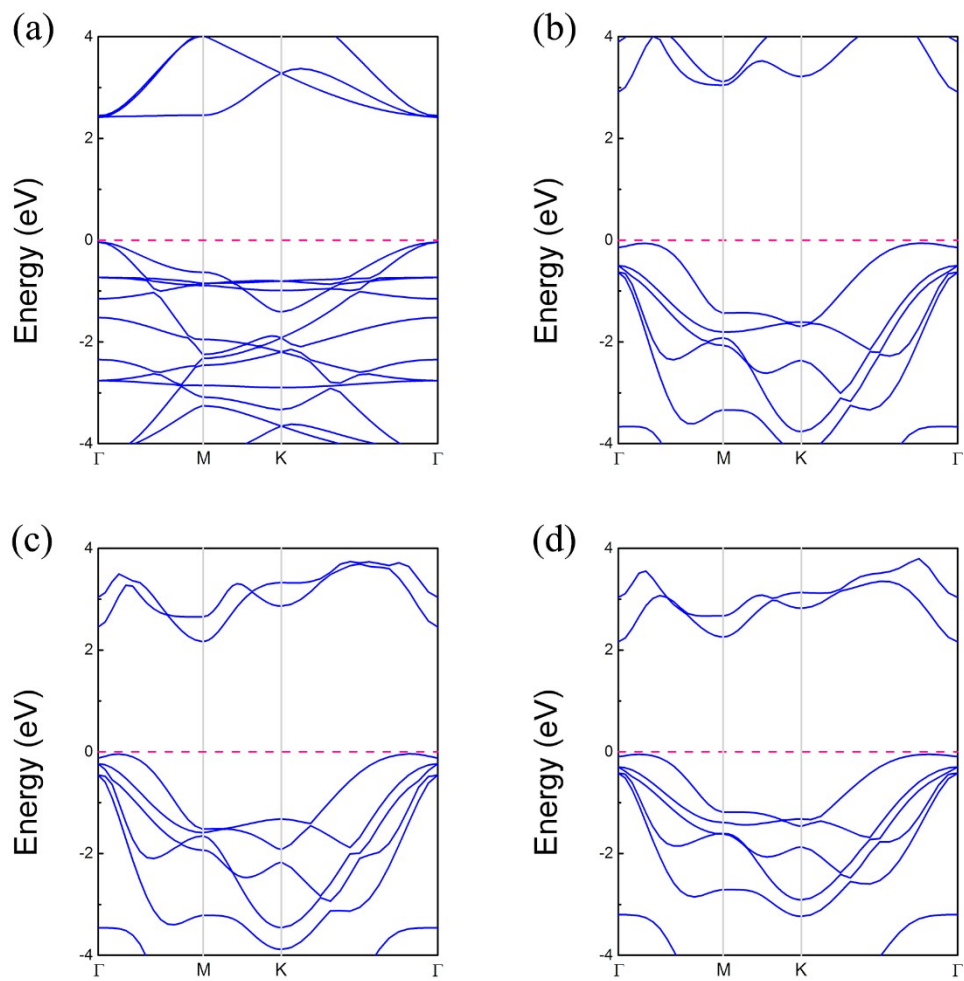

**Fig. S2** Electronic band structures of (a)  $C_2N$ , (b) GaSe, (c) GaTe and (d) InTe monolayers.

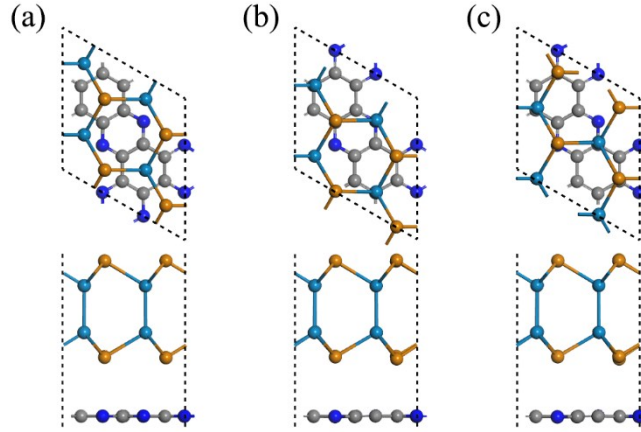

**Fig. S3** Top and side view of three possible stacking patterns for  $C_2N/MX$  heterojunctions.

**Table S2.** Relative binding energies (eV) of three stacking patterns for  $C_2N/MX$  heterojunctions.

|             | a | b    | c    |
|-------------|---|------|------|
| $C_2N/GaSe$ | 0 | 0.13 | 0.08 |
| $C_2N/GaTe$ | 0 | 0.11 | 0.09 |
| $C_2N/InTe$ | 0 | 0.11 | 0.10 |

**Table S3.** Lattice parameters ( $a = b$ , Å) and binding energies ( $E_b$ , meV/Å<sup>2</sup>) of the heterojunctions. The lattice mismatch for  $C_2N$  and MX and the distance ( $d$ , Å) between  $C_2N$  and MX.

|             | a    | $E_b$ | $C_2N$ | MX    | d    |
|-------------|------|-------|--------|-------|------|
| $C_2N/GaSe$ | 8.14 | 20.2  | -2.2%  | 8.0%  | 3.40 |
| $C_2N/GaTe$ | 8.28 | -10.8 | -0.5%  | 1.2%  | 3.49 |
| $C_2N/InTe$ | 8.39 | -9.6  | 0.8%   | -2.9% | 3.45 |

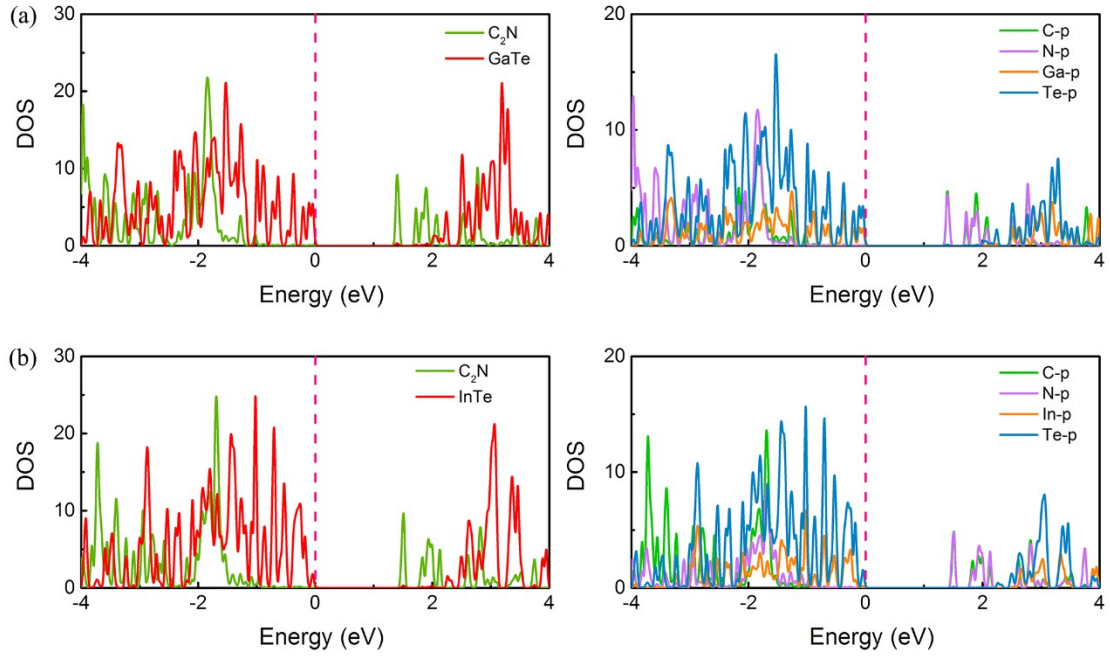

**Fig. S4** Partial density of states (PDOS) near Fermi level for (a)  $C_2N/GaTe$  and (b)  $C_2N/InTe$ .

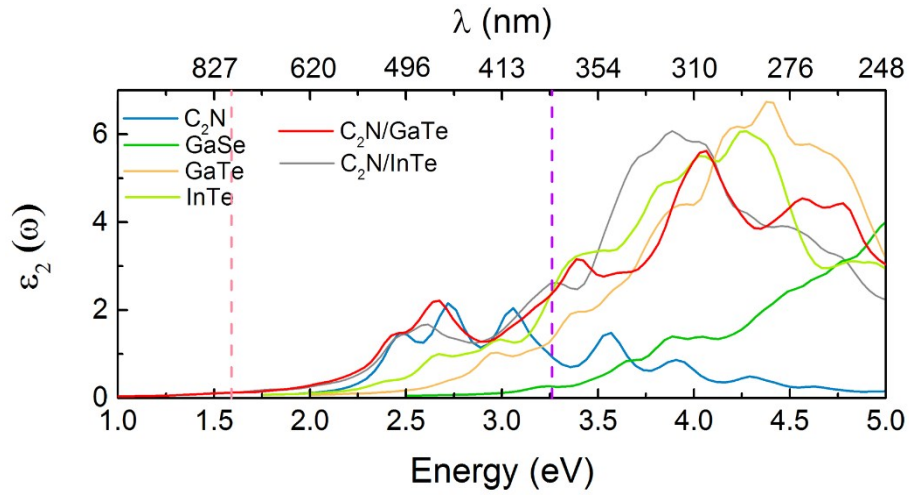

**Fig. S5** Imaginary parts of dielectric function for the isolated  $C_2N$ , GaSe, GaTe and InTe monolayers as well as  $C_2N/GaTe$  and  $C_2N/InTe$  heterojunctions. The area between the red and the purple dashed lines represents the visible-light range.

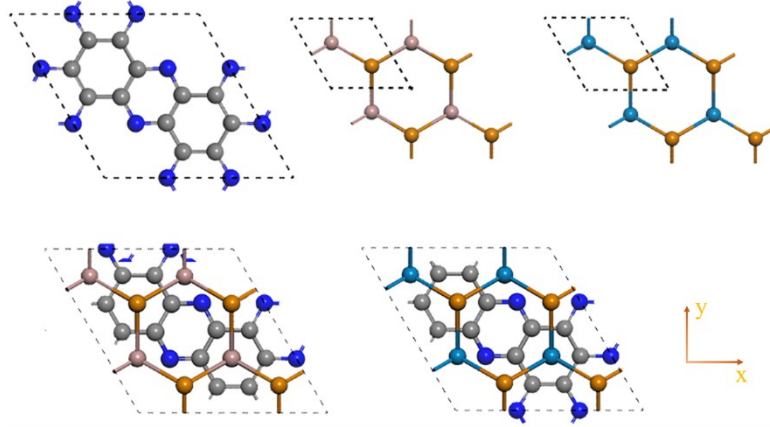

**Fig. S6** The x and y directions investigated in this work.

**Table S4.** Effective mass  $|m^*|$  ( $m_e$ , mass of free electrons), in-plane stiffness  $C$  ( $\text{N m}^{-1}$ ), DP constant  $|E_1|$  (eV) and carrier mobility  $\mu_{2D}$  ( $\text{cm}^2 \text{V}^{-1} \text{s}^{-1}$ ) for electrons and holes for isolated  $\text{C}_2\text{N}$ , GaTe and InTe monolayers along the direction of x and y, respectively.

|                      |       | $ m^* $ | $C$    | $ E_1 $ | $\mu_{2D}$ |
|----------------------|-------|---------|--------|---------|------------|
| $\text{C}_2\text{N}$ | $e_x$ | 0.46    | 163.21 | 1.54    | 4505.64    |
|                      | $h_x$ | 12.57   | 163.21 | 2.71    | 2.00       |
|                      | $e_y$ | 0.42    | 162.95 | 1.90    | 3631.42    |
|                      | $h_y$ | 7.96    | 162.95 | 3.35    | 3.25       |
| GaTe                 | $e_x$ | 0.13    | 64.16  | 11.56   | 381.90     |
|                      | $h_x$ | 1.30    | 64.16  | 2.67    | 74.75      |
|                      | $e_y$ | 0.57    | 64.11  | 1.04    | 2530.78    |
|                      | $h_y$ | 1.08    | 64.11  | 2.88    | 93.95      |
| InTe                 | $e_x$ | 0.16    | 48.97  | 9.71    | 303.33     |
|                      | $h_x$ | 1.82    | 48.97  | 2.58    | 28.23      |
|                      | $e_y$ | 0.16    | 48.48  | 9.70    | 287.16     |
|                      | $h_y$ | 1.76    | 48.48  | 2.85    | 27.30      |

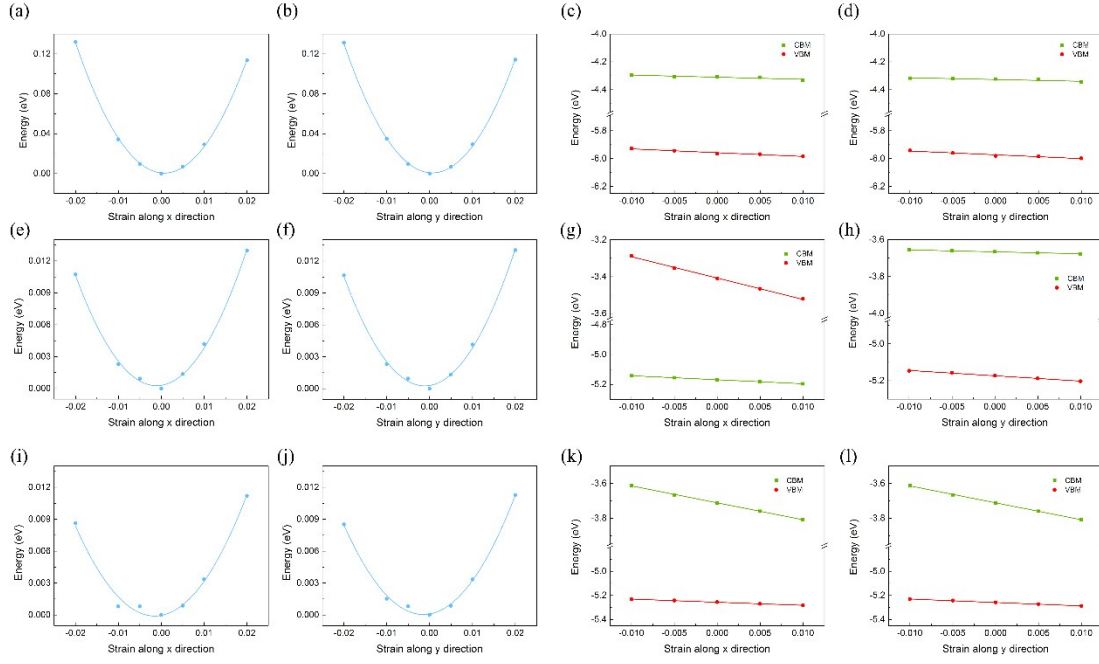

**Fig. S7** The relationship between energy and strain for (a,b)  $C_2N$ , (e,f) GaTe and (i,j) InTe. The CBM and VBM along the x and y directions as a function of deformation proportion for (c,d)  $C_2N$ , (g,h) GaTe and (k,l) InTe.

**Table S5.** Macroscopic static dielectric constants and the exciton binding energies of isolated  $C_2N$ , GaTe and InTe monolayers as well as  $C_2N/GaTe$  and  $C_2N/InTe$  heterojunctions.

|             | $\epsilon_{el}$ |      |      | $\epsilon_{ion}$ |      |      | $E_b$ |
|-------------|-----------------|------|------|------------------|------|------|-------|
|             | x               | y    | z    | x                | y    | z    |       |
| $C_2N$      | 0.04            | 0.04 | 0    | 2.63             | 2.63 | 1.12 | 1.24  |
| GaTe        | 0.83            | 0.83 | 0    | 4.11             | 4.11 | 1.42 | 0.27  |
| InTe        | 1.08            | 1.08 | 0.01 | 3.98             | 3.98 | 1.46 | 0.14  |
| $C_2N/GaTe$ | 0.80            | 0.80 | 0.02 | 4.54             | 4.54 | 1.45 | 0.31  |
| $C_2N/InTe$ | 0.88            | 0.88 | 0.01 | 4.48             | 4.48 | 1.50 | 0.13  |

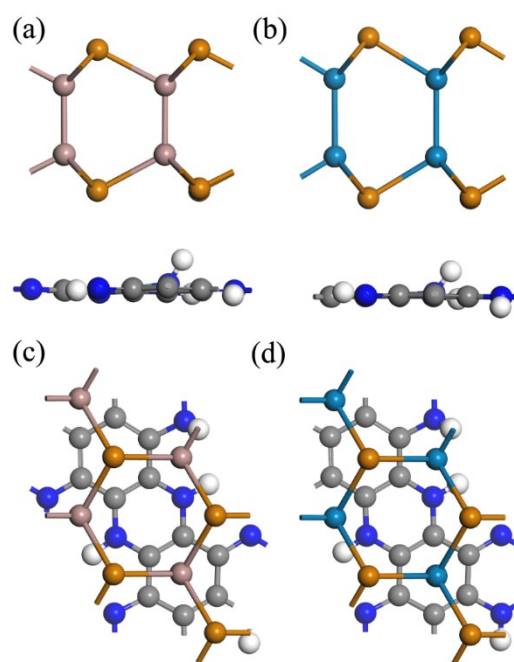

**Fig. S8** Side and top view of optimized geometric structures for the fourth hydrogen atom adsorbed on (a,c) C<sub>2</sub>N/GaTe and (b,d) C<sub>2</sub>N/InTe heterojunctions. The white balls represent hydrogen atoms.
